# Supplementary material for: Plasma HSP90AA1 Predicts the Risk of Breast Cancer Onset and Distant Metastasis
Source: PubMed Central journal article supplement (PMC8181396; doi:10.3389/fcell.2021.639596), 2021-05-24
Supplement: Image_2.pdf [file Image_2.pdf]

A

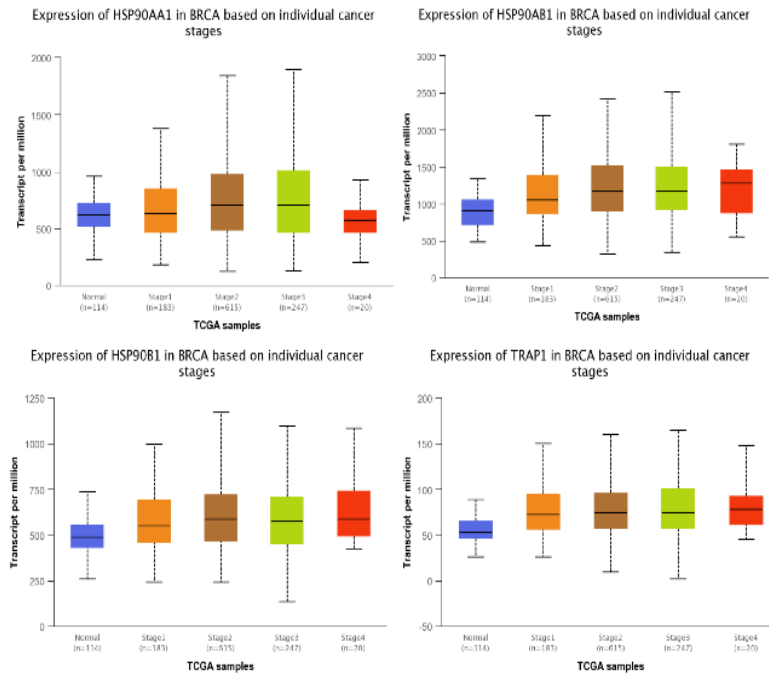

B

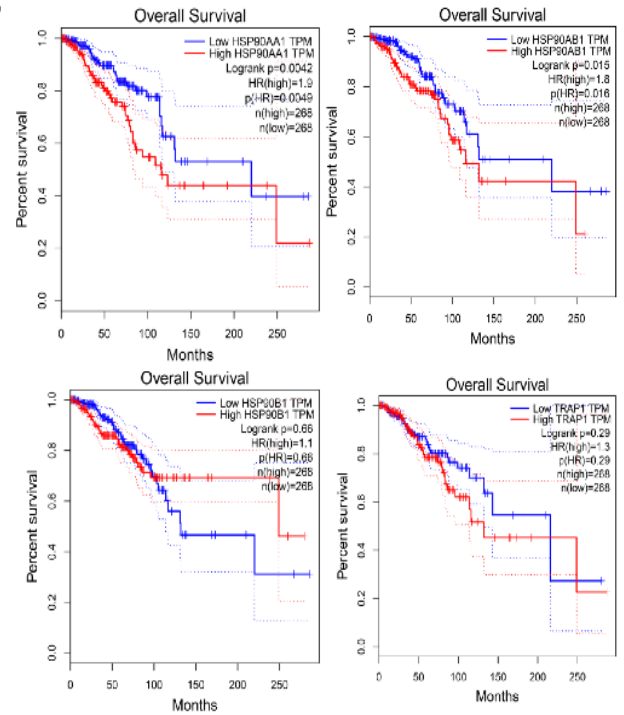

**Supplementary Figure 2. Correlations of the expression levels of HSP90s with tumor stages and prognostic values of HSP90s in breast cancer patients.** (A) The UALCAN is used to determine the relationship between the expression levels of *HSP90AA1*, *HSP90AB1*, *HSP90B1*, and *TRAP1* and tumor stages in breast cancer patients ( $p < 0.05$ ). The x-axis indicates the stage of breast cancer tumors, and the y-axis shows the expression level of HSP90s (gene expression ~ pathological stage). (B) The overall survival curves comparing breast cancer patients with high (red) and low (blue) HSP90s expression levels are plotted using the GEPIA.
