# Supplementary material for: Plasma HSP90AA1 Predicts the Risk of Breast Cancer Onset and Distant Metastasis
Source: PubMed Central journal article supplement (PMC8181396; doi:10.3389/fcell.2021.639596), 2021-05-24
Supplement: Image_4.pdf [file Image_4.pdf]

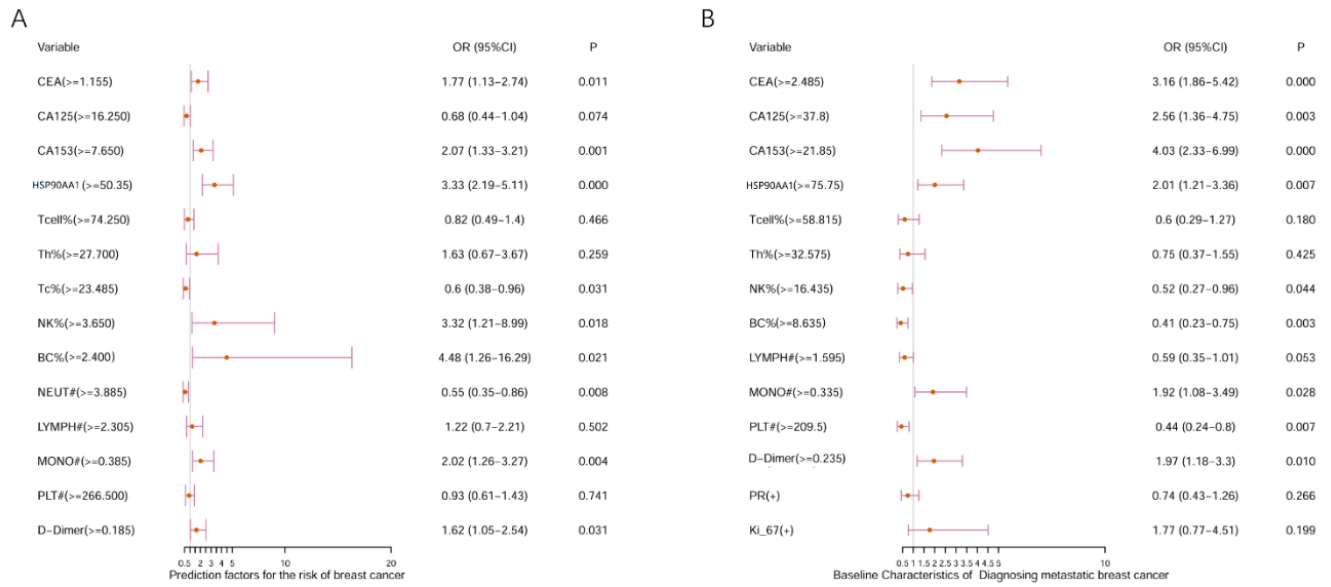

**Supplementary Figure 4. Prediction factors for our research. (A) Cancer risk cohort, (B) The metastasis risk cohort.**
