# Supplementary material for: Plasma HSP90AA1 Predicts the Risk of Breast Cancer Onset and Distant Metastasis
Source: PubMed Central journal article supplement (PMC8181396; doi:10.3389/fcell.2021.639596), 2021-05-24
Supplement: Image_6.pdf [file Image_6.pdf]

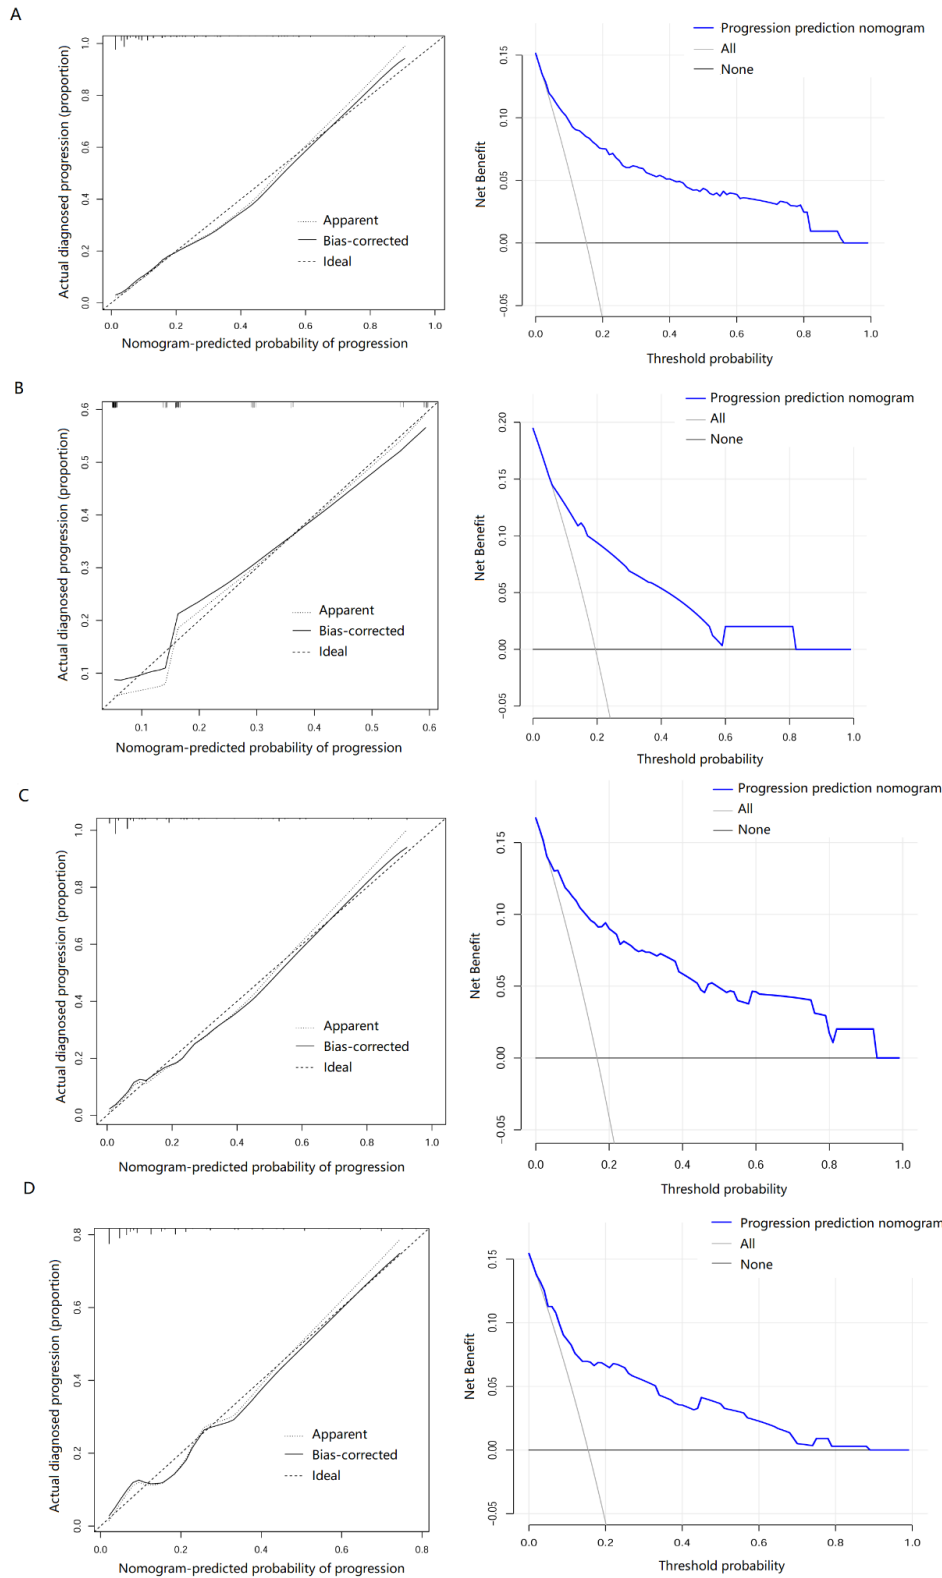

**Supplementary Figure 6. Calibration curves of the nomogram prediction in patients with different molecular types metastasis risk. HR (A) positive, (B) negative, HER2 (C) positive, and (D) negative patients.**
